# Supplementary material
Source: PubMed Central journal article supplement (PMC1839928)
Supplement: NIHMS18543-supplement-01.pdf [file NIHMS18543-supplement-01.pdf]

**Supplementary Table 1.** Comparison of Properties of DksA, GreA, and GreB

| Attribute                                                                                                    | DksA | GreA | GreB |
|--------------------------------------------------------------------------------------------------------------|------|------|------|
| Binds in RNAP secondary channel <sup>a</sup>                                                                 | +    | +    | +    |
| Acidic tip near RNAP active site <sup>b</sup>                                                                | +    | +    | +    |
| Relative apparent affinity for RNAP <sup>c</sup>                                                             | 1    | 0.13 | 1    |
| Relative ability to decrease RNAP-promoter complex half-life <sup>d</sup>                                    | 1    | 0.3  | 1    |
| Inhibits <i>rrnB</i> P1 transcription <i>in vitro</i> <sup>e</sup>                                           | +    | +/-  | +    |
| Enhances effects of ppGpp and iNTP on <i>rrnB</i> P1 transcription <i>in vitro</i> <sup>f</sup>              | +    | +/-  | +    |
| Required for control of rRNA promoters <i>in vivo</i> <sup>g</sup>                                           | +    | –    | –    |
| Relative concentration <i>in vivo</i> <sup>h</sup>                                                           | 1    | 0.4  | 0.1  |
| Complements $\Delta dksA$ strain for regulation of rRNA (when expressed to appropriate level) <sup>i</sup>   | +    | –    | +    |
| Facilitates activation by ppGpp of amino acid biosynthesis gene promoters <sup>j</sup>                       | +    | –    | –    |
| Rescues ability of RNAP lacking $\omega$ to respond to ppGpp <i>in vitro</i> and <i>in vivo</i> <sup>k</sup> | +    | –    | –    |
| Activates RNA cleavage activity of RNAP <sup>l</sup>                                                         | –    | +    | +    |
| Prevents formation of arrested elongation complexes <sup>m</sup>                                             | +    | +    | +    |
| Rescues arrested elongation complexes <sup>n</sup>                                                           | –    | –    | +    |

<sup>a</sup> – References 19, 20, 21, 22, and I. Touloukhonov, J. Mukhopadhyay J., R.H. Ebright, and R.L.G., unpublished data.

<sup>b</sup> – References 19, 20, 21, 22, and I. Touloukhonov, J. Mukhopadhyay J., R.H. Ebright, and R.L.G., unpublished data.

<sup>c</sup> – Apparent affinities for RNAP relative to affinity of DksA for RNAP (Figure 2).

<sup>d</sup> – Relative to effect of DksA at saturation. See Figure 2 and reference 14.

<sup>e</sup> – +/- indicates GreA decreased *rrnB* P1 transcription < 2-fold, whereas GreB and DksA edcreased transcription 30 to 50-fold (Figure 1).

<sup>f</sup> – +/- indicates GreA minimally enhanced the effect of ppGpp (even at increased concentration) and had no effect on iNTP concentration-dependence. See Figure 1 and reference 14.

<sup>g</sup> – See Figure 3 and reference 14.

<sup>h</sup> – See Figure 4.

<sup>i</sup> – See Figure 5.

- <sup>j</sup> – See Figure 6.
- <sup>k</sup> – See Figure 7 and reference 17.
- <sup>l</sup> – References 19, 20.
- <sup>m</sup> – References 19, 20.
- <sup>n</sup> – References 19, 20.
